# Supplementary material for: From Standard Text to Simplified Learning: A Conceptual Framework for Developing Adolescent-Friendly Sexual and Reproductive Health Resources in Ghana
Source: Research Square preprint supplement (doi:10.21203/rs.3.rs-7879931/v1), 2025-11-11

**Supplementary file 1:**

**Samples of Pictures created and validated by Adolescents and Stakeholders**

| Samples of Pictures Suggested by Educational Administrators                         |                                        |                                                                                      |
|-------------------------------------------------------------------------------------|----------------------------------------|--------------------------------------------------------------------------------------|
| Menopausal women (aged 45 and above)                                                |                                        |    |
| Right partner (abstaining from sex until you find the right partner)                |                                        |    |
| Lust and love (what seems like love may actually be lust)                           |                                        |    |
| Do's and don'ts (for personal friendship)                                           |                                        |   |
| Abstinence                                                                          |                                        |  |
| Samples of Pictures Modified Based on Stakeholder Validation                        |                                        |                                                                                      |
| Before validation                                                                   |                                        | After validation                                                                     |
|  | Do not keep a condom in a pocket/purse |  |

|                                                                                     |                                                                                      |                                                                                      |
|-------------------------------------------------------------------------------------|--------------------------------------------------------------------------------------|--------------------------------------------------------------------------------------|
|    | Having sex with multiple partners (Risky behaviors to avoid)                         |    |
|    | Having sex for money (Risky behaviors to avoid)                                      |    |
|    | Pimples in the face (used as an example of signs of sexual maturation)               |    |
|   | Ovulation                                                                            |   |
|  | Menstrual cycle                                                                      |  |
| Samples of Visual Representations Illustrating Select SRH Concepts                  |                                                                                      |                                                                                      |
| Ways to avoid pregnancy (contraceptives and methods)                                |  |                                                                                      |

|                                                               |                                                                                                                                                                                                                                                                                                                                                                                                                                                                                                                                                                                                 |
|---------------------------------------------------------------|-------------------------------------------------------------------------------------------------------------------------------------------------------------------------------------------------------------------------------------------------------------------------------------------------------------------------------------------------------------------------------------------------------------------------------------------------------------------------------------------------------------------------------------------------------------------------------------------------|
| Common sexually transmitted infections                        |  CHLAMYDIA<br> SYPHILIS<br> GONORRHEA<br> YEAST INFECTION<br> TRICHOMONIASIS<br> HIV/AIDS |
| Some symptoms of syphilis                                     |  <p>Feeling ill<br/>Fever<br/>Headache<br/>Weight loss<br/>Rashes on palms,<br/>hands and feet.</p>                                                                                                                                                                                                                                                                                                                                                                                                           |
| Some symptoms of HIV                                          |  <p>Diarrhea<br/>Mouth Sore<br/>Sore Throat<br/>Fever<br/>Night Sweat<br/>Tiredness</p>                                                                                                                                                                                                                                                                                                                                                                                                                       |
| Outercourse (an example of sexual activity)                   |                                                                                                                                                                                                                                                                                                                                                                                                                                                                                                             |
| A sex act/sexual intercourse (an example of sexual activity)  |                                                                                                                                                                                                                                                                                                                                                                                                                                                                                                             |
| Wet dreams (used as an example of signs of sexual maturation) |                                                                                                                                                                                                                                                                                                                                                                                                                                                                                                             |

|                                                                         |                                                                                                            |
|-------------------------------------------------------------------------|------------------------------------------------------------------------------------------------------------|
| Bigger/longer pennis (used as an example of signs of sexual maturation) | 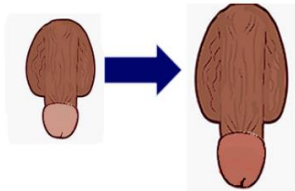                         |
| Vaginal discharge (used as an example of signs of sexual maturation)    |                          |
| Tips to Overcome Sexual Desires                                         |                                                                                                            |
| Think about what can happen when you have early sex                     |                          |
| Avoid Porn pictures and videos                                          |                         |
| Consequences of Early Sex                                               |                                                                                                            |
| Continuous poverty                                                      |                        |
| Dropping out of school                                                  | <p>School Dropout</p>  |

Unable to learn a trade or vocation

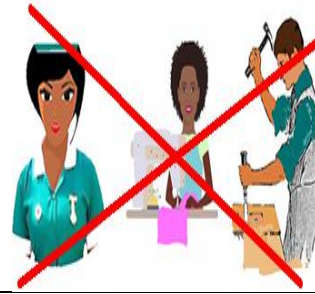

Supplement: Supplementary file 1 [file 442785e2653e62c64247c78a.pdf]
